# Supplementary material
Source: PubMed Central journal article supplement (PMC3964097)
Supplement: 1320562111_pnas.201320562SI.pdf [file 1320562111_pnas.201320562SI.pdf]

# Supporting Information

Forcelli et al. 10.1073/pnas.1320562111

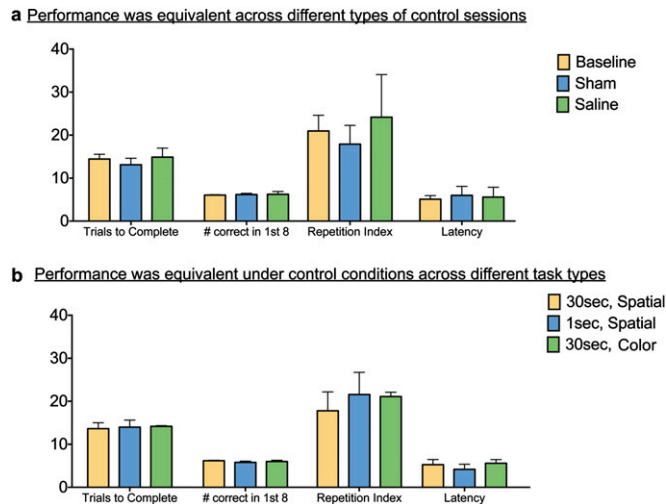

**Fig. S1.** Performance on control sessions. (A) Graph presents performance data for the three types of control sessions (i.e., baseline, sham, and saline infusion) for each of the performance measures (i.e., trials to complete a session, number of correct responses in the first eight trials, repetition index, and response latency). For each bar, data were collapsed across the three versions of the task (i.e., spatial with 1-s delay, spatial with 30-s delay, and color-cued); 3 (control session type)  $\times$  4 (performance measure) ANOVA yielded no significant main effect of control session type ( $F_{2,8} = 0.24, P = 0.80$ ) or interaction between control session type and performance measure ( $F_{6,24} = 0.28, P = 0.94$ ). (B) Graph presents performance data for the three versions of the task (i.e., spatial with 1-s delay, spatial with 30-s delay, and color-cued) for each of the performance measures. For each bar, data were collapsed across the three types of control session; 3 (version of the task)  $\times$  4 (performance measure) ANOVA resulted in no significant effect of the version of the task ( $F_{2,8} = 0.11, P = 0.94$ ) or interaction between the version of the task and performance measure ( $F_{6,24} = 0.31, P = 0.93$ ). Because the performance data did not differ as a function of either the control session type or the task version, they were collapsed for further analyses and the collapsed data are shown as “control” in Fig. 2. Graphs show means  $\pm$  SEM.

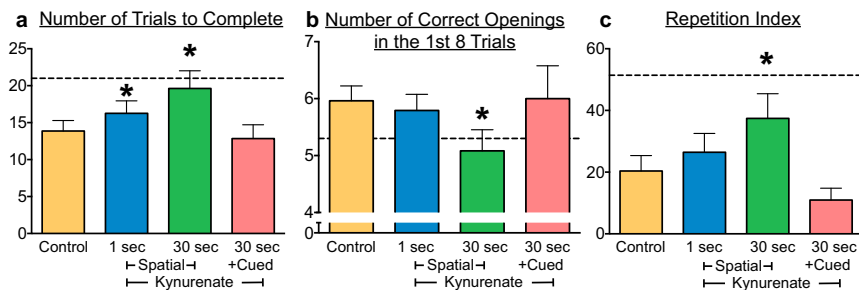

**Fig. S2.** Kynurenate (KYNA) performance compared with saline/sham control sessions. Graphs represent a reanalysis of the data presented in Fig. 2 of the main text. For this analysis the performance in baseline sessions was excluded; instead, only saline-infusion and sham sessions were included in the control. For each monkey, we conducted an approximately equivalent number of sham/saline sessions and KYNA sessions. These sessions were used to derive the average value for each monkey. The analysis revealed a pattern equivalent to that seen when baseline sessions were included in the mean control value for each animal (Fig. 2 of the main text). Skillings–Mack test (with Bonferroni-corrected Conover post hocs) revealed a treatment effect for (A) number of trials to complete ( $Q = 10.118, P < 0.005$ ), (B) number of correct openings in the first eight trials ( $Q = 7.16, P < 0.05$ ), and (C) repetition index ( $Q = 10.827, P < 0.001$ ). \*Significantly different from control,  $P < 0.05$ .

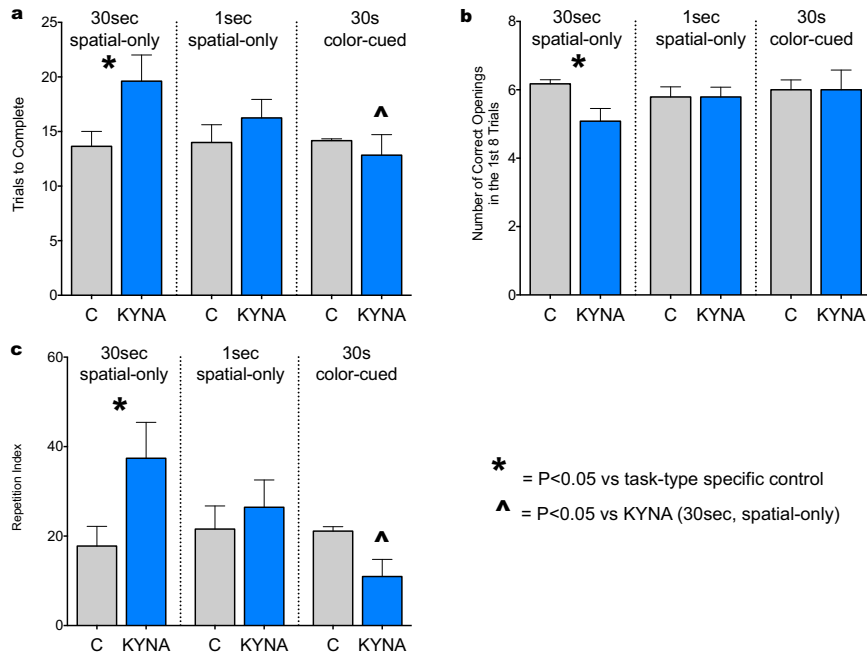

**Fig. S3.** Performance compared with task-specific control sessions. For this analysis we compared performance on each task type under KYNA-infused conditions with its task-type-specific control using a mixed-effects model (with treatment within task type as a repeated measure and monkey as a random effect). This analysis also allowed us to compare differences in task type within each treatment. (A) For trials to complete, we found a significant main effect of treatment within task type ( $F_{1,5} = 4.45, P = 0.015$ ). Post hoc analysis revealed a significant difference between control and KYNA sessions for the 30-s spatial condition ( $P < 0.005$ ), but no other conditions. Moreover, the performance with KYNA for the 30-s spatial condition was significantly impaired compared with the color-cued condition ( $P < 0.01$ ) but did not differ from the 1-s spatial condition. (B) For number of correct openings in the first eight trials, the analysis revealed a trend toward a treatment-within-task-type effect ( $F_{1,5} = 2.675, P = 0.068$ ), with the KYNA-infused 30-s spatial condition significantly worse than the respective control ( $P < 0.005$ ), but not different from KYNA-infused sessions for the other task types. (C) For repetition index, the analysis revealed a significant effect of treatment within task type ( $F_{1,12.58} = 5.337, P < 0.01$ ). For the 30-s, spatial condition, but no other task types, KYNA significantly impaired performance ( $P < 0.005$ ) and was significantly worse than the color-cued KYNA-infused condition ( $P < 0.005$ ).

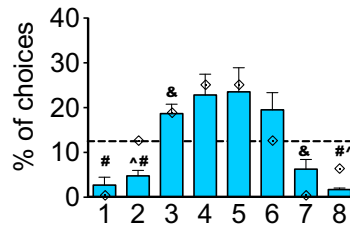

**Fig. S4.** Distribution of box selections on the first trial of a run. Frequency distribution showing the percent of times a given box (out of the eight possibilities) was selected on the first trial. For control runs, the distribution was calculated for each monkey and averaged across all subjects (blue bars, mean  $\pm$  SEM). For the 30-s KYNA condition ( $\diamond$ ), because there were fewer sessions a single distribution was built pooling data from all of the monkeys. The dashed line indicates chance level (12.5%). The data show that the animals avoided boxes at the ends of the array in favor of those in the middle for the first choice in the run. The pattern was similar for the KYNA and control conditions. #Values that are significantly below those expected by random box selection ( $t = 5.6, P = 0.01$ ;  $t = 6.4, P = 0.008$ ; and  $t = 30.6, P < 0.001$  for boxes 1, 2, and 8, respectively). &A trend ( $P < 0.10$ ). ^A significant difference from the control distribution when tested with KYNA on the 30-s spatial version of the task.





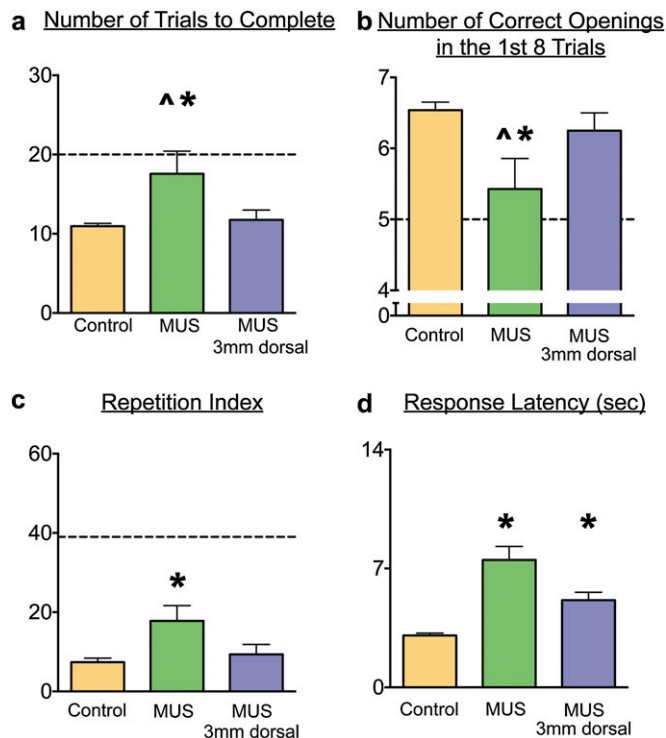

**Fig. S9.** Effects of muscimol (9 nmol) infusions in animal TX. The graphs present data from one animal (TX, represented by  $\circ$  in Fig. 2 of the main text) for the 30-s spatial version of the task after muscimol (MUS) infusions into hippocampus, and after MUS infusions placed 3 mm dorsal to the hippocampus. MUS infusions bilaterally into hippocampus reduced performance to a chance level on two measures: (A) the number of trials to complete a run (one-sample  $t$  test:  $t = 0.85$ ,  $df = 6$ ,  $P = 0.21$ , compared with chance; ^no difference from chance) and (B) the number of correct openings in the first eight trials ( $t = 1.0$ ,  $df = 6$ ,  $P = 0.18$ ). Further, MUS infusions into hippocampus significantly impaired performance on all measures compared with control. ANOVAs applied to each performance measure yielded the following significant results: (A) trials to complete a run;  $F_{2,34} = 9.37$ ,  $P = 0.0006$ , post hoc analysis for control versus MUS in the hippocampus  $P = 0.003$ ; (B) number of correct responses in the first eight trials;  $F_{2,34} = 6.83$ ,  $P = 0.0032$ ; post hoc  $P = 0.0015$ ; and (C) repetition index;  $F_{2,34} = 7.44$ ,  $P = 0.0021$ ; post hoc  $P = 0.001$ . Placement of MUS 3 mm dorsal to the hippocampus did not alter task performance on any measure ( $P > 0.05$ ). (D) MUS infusions either into the hippocampus or dorsal to it significantly increased response latency ( $F_{2,34} = 47.07$ ,  $P < 0.0001$ ; post hoc comparisons yielded  $P = 0.001$  and  $P = 0.0025$ , for MUS in the hippocampus or dorsal to it compared with control). Because the increase in response latency and performance decrements were dissociated, motor confounds are not sufficient to account for the effect on memory. Bars show mean + SEM.

**Table S1. Results of chance performance simulations**

| Chance (Monte Carlo simulations)      | Mean | Median | No. of valid simulations | SD   |
|---------------------------------------|------|--------|--------------------------|------|
| Trials to complete                    | 21.0 | 20.00  | 1,971                    | 7.5  |
| No. correct in the first eight trials | 5.3  | 5.0    | 2,000                    | 0.90 |
| Repetition index                      | 51.4 | 47.17  | 2,000                    | 30.3 |
| Alternation score                     | 1.3  | 1      | 15,000                   | 0.97 |
